# Supplementary material for: Enhancing navigation in biomedical databases by community voting and database-driven text classification
Source: Springer Nature journal article supplement (doi:10.1186/1471-2105-10-317), 2009-10-03
Supplement: 12859_2009_3047_MOESM1_ESM.pdf [file 12859_2009_3047_MOESM1_ESM.pdf]

## 1. Query using text or sequence search

Search

## 2. Explore results and add constraints

Set minimum prediction values

CA (Cancer) 0.5

CVD (Cardiovascular disease) 0

DM (Diabetes) 0

APO (Apoptosis) 0

ANG (Angiogenesis) 0.5

MI (Molecular imaging) 0

BD (Binding data available) 0

Details

Results 1 - 20 of 32

| CA | CVD | DM | APO | ANG | MI | BD |                          | Peptide | Sequence                       | Interactor | Reference                | Score |
|----|-----|----|-----|-----|----|----|--------------------------|---------|--------------------------------|------------|--------------------------|-------|
|    |     |    |     |     |    |    | <input type="checkbox"/> | YWKV    | <a href="#">YWKV</a>           | unknown    | <a href="#">11026536</a> | 0.49  |
|    |     |    |     |     |    |    | <input type="checkbox"/> | RGDYK   | <a href="#">RGDYK</a>          | unknown    | <a href="#">11216533</a> | 0.49  |
|    |     |    |     |     |    |    | <input type="checkbox"/> | YRGDY   | <a href="#">YRGDYK</a>         | unknown    | <a href="#">11216533</a> | 0.49  |
|    |     |    |     |     |    |    | <input type="checkbox"/> | YRGDY   | <a href="#">YRGDYV</a>         | unknown    | <a href="#">11216533</a> | 0.49  |
|    |     |    |     |     |    |    | <input type="checkbox"/> | ATWLP   | <a href="#">ATWLPPR</a>        | KDR        | <a href="#">10747021</a> | 0.77  |
|    |     |    |     |     |    |    | <input type="checkbox"/> | RLVSY   | <a href="#">RLVSYNGIIFFLK</a>  | unknown    | <a href="#">15256450</a> | 0.5   |
|    |     |    |     |     |    |    | <input type="checkbox"/> | RGD     | <a href="#">RGD</a>            | unknown    | <a href="#">16391196</a> | 0.68  |
|    |     |    |     |     |    |    | <input type="checkbox"/> | RGDFV   | <a href="#">RGDFV</a>          | unknown    | <a href="#">10452325</a> | 0.49  |
|    |     |    |     |     |    |    | <input type="checkbox"/> | YRADY   | <a href="#">YRADYV</a>         | unknown    | <a href="#">10452325</a> | 0.49  |
|    |     |    |     |     |    |    | <input type="checkbox"/> | YRGDY   | <a href="#">YRGDYV</a>         | unknown    | <a href="#">10452325</a> | 0.49  |
|    |     |    |     |     |    |    | <input type="checkbox"/> | YRGDF   | <a href="#">YRGDFY</a>         | unknown    | <a href="#">10452325</a> | 0.49  |
|    |     |    |     |     |    |    | <input type="checkbox"/> | SYSPY   | <a href="#">SYSPYDMLSEIK</a>   | unknown    | <a href="#">12453439</a> | 0.49  |
|    |     |    |     |     |    |    | <input type="checkbox"/> | SLYYI   | <a href="#">SLYYIQQDTK</a>     | unknown    | <a href="#">12453439</a> | 0.5   |
|    |     |    |     |     |    |    | <input type="checkbox"/> | HTMYY   | <a href="#">HTMYHHYQHHL</a>    | KDR        | <a href="#">12183450</a> | 0.75  |
|    |     |    |     |     |    |    | <input type="checkbox"/> | SFLLR   | <a href="#">SFLLRNPNDKYEPE</a> | unknown    | <a href="#">14521590</a> | 0.49  |

## 3. Review and vote

Classification incorrect?  
 Click the corresponding button to vote. Your vote is used to improve the automatic classification.

"Yes, abstract is *related*."  
 "No, abstract is *not related*."

| CA                    | CVD                   | DM                    | APO                   | ANG                   | MI                    | BD                    | Vote |
|-----------------------|-----------------------|-----------------------|-----------------------|-----------------------|-----------------------|-----------------------|------|
| <input type="radio"/> | <input type="radio"/> | <input type="radio"/> | <input type="radio"/> | <input type="radio"/> | <input type="radio"/> | <input type="radio"/> | Yes  |
| <input type="radio"/> | <input type="radio"/> | <input type="radio"/> | <input type="radio"/> | <input type="radio"/> | <input type="radio"/> | <input type="radio"/> | No   |

Pubmed **Text Id** 11026536

Bioorg Med Chem. 2000 Sep;8(9):2229-41.

*Template-constrained cyclic peptide analogues of somatostatin: subtype-selective binding to somatostatin receptors and antiangiogenic activity.*

Suich DJ, Mousa SA, Singh G, Liapakis G, Reisine T, DeGrado WF

Beta-turns are a common secondary structure motif found in proteins that play a role in protein folding and stability and participate in molecular recognition interactions. Somatostatin, a peptide hormone possessing a variety of therapeutically-interesting biological activities, contains a beta-turn in its bioactive conformation. The beta-turn and biological activities of somatostatin have been successfully mimicked in cyclic hexapeptide analogues. Two novel, structured, non-peptidic molecules were developed that are capable of holding the bioactive tetrapeptide sequence of somatostatin analogues in a beta-turn conformation, as measured by somatostatin receptor (SSTR) binding. Template-constrained cyclic peptides in which the ends of the **-Tyr-D-Trp-Lys-Val-tetrapeptide** were linked by scaffolds based on either an N,N'-dimethyl-N,N'-diphenylurea or a substituted biphenyl system (DJS631 and DJS811, respectively), bound selectively to mouse SSTR2B and rat and human
