# Supplementary material for: Enhancing navigation in biomedical databases by community voting and database-driven text classification
Source: Springer Nature journal article supplement (doi:10.1186/1471-2105-10-317), 2009-10-03

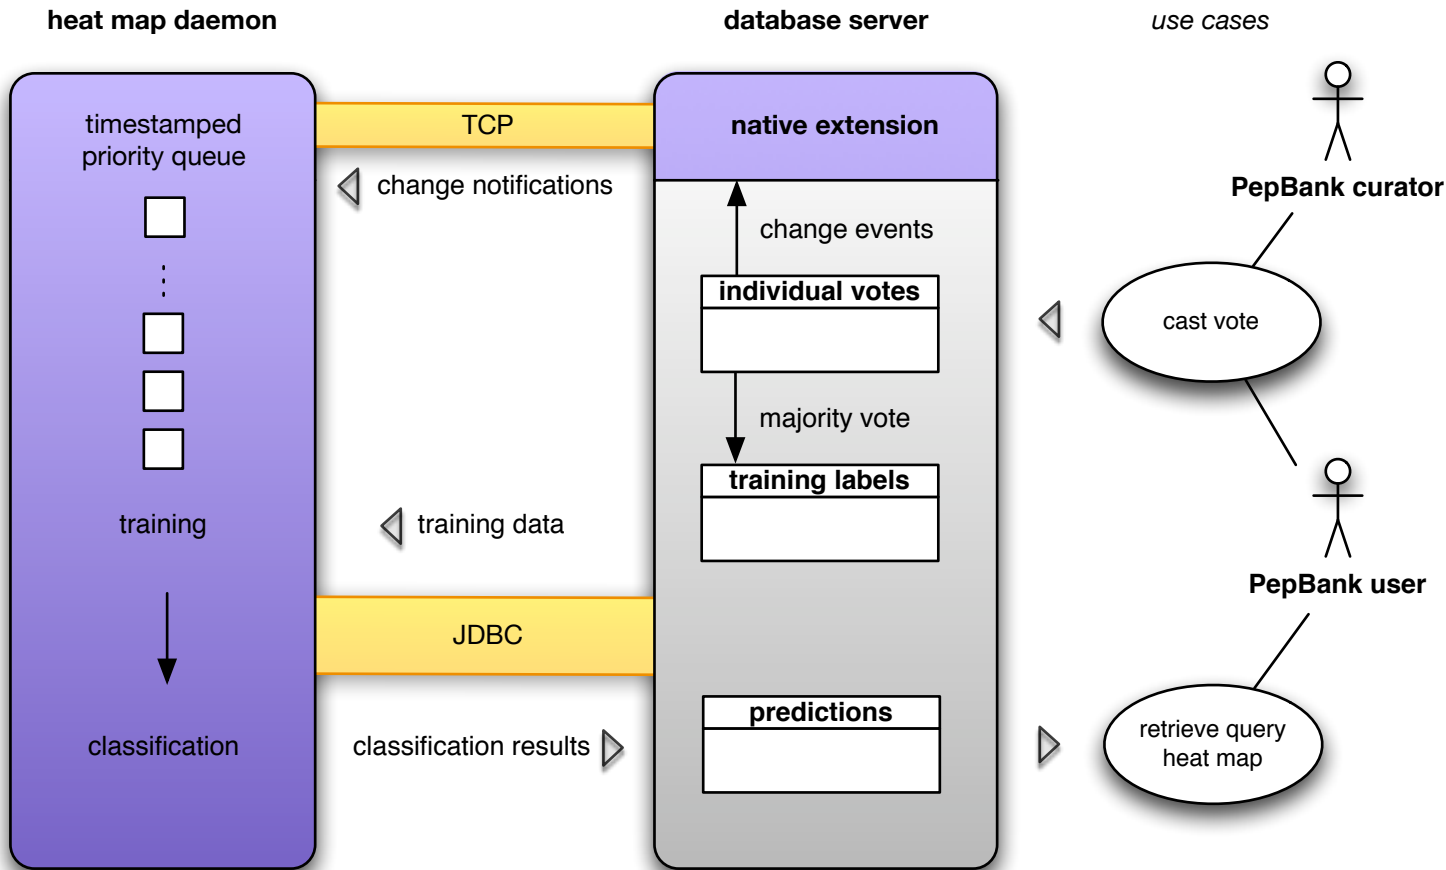

Supplement: 12859_2009_3047_MOESM4_ESM.pdf [file 12859_2009_3047_MOESM4_ESM.pdf]
